# Supplementary material for: Stereoselective synthesis of (Z)-α-haloacrylic acid derivatives, and (Z)-haloallylic alcohols from aldehydes and trihaloesters or amides promoted by Rieke manganese
Source: Royal Society of Chemistry journal article supplement (doi:10.1039/b803449d), 2008-01-01

**Electronic Supplementary Information**

**Stereoselective synthesis of (Z)- $\alpha$ -haloacrylic acid derivatives, and (Z)-haloallylic alcohols from aldehydes and trihaloesters or amides promoted by Rieke**

**Manganese**

José M. Concellón,\* Humberto Rodríguez-Solla, and Pamela Díaz

*Departamento de Química Orgánica e Inorgánica,  
Universidad de Oviedo, Julián Clavería, 8, 33071 Oviedo,  
Spain.  
jmcg@uniovi.es*

|                                                                               |     |
|-------------------------------------------------------------------------------|-----|
| General.....                                                                  | S2  |
| Ethyl (Z)-2-Chlorodec-2-enoate ( <b>3a</b> ).....                             | S3  |
| <i>iso</i> Propyl (Z)-2-Chloro-3-cyclohexylacrylate ( <b>3d</b> ).....        | S4  |
| Ethyl (Z)-2-Chloro-4-methylhex-2-enoate ( <b>3f</b> ).....                    | S5  |
| Ethyl (Z)-2-Chlorotrideca-2,12-dienoate ( <b>3g</b> ).....                    | S6  |
| Ethyl (Z)-2-Chloro-3-(4-methoxyphenyl)acrylate ( <b>3h</b> ).....             | S7  |
| <i>iso</i> Propyl (Z)-2-Bromo-3-cyclohexylacrylate ( <b>3j</b> ).....         | S8  |
| Ethyl (Z)-2-Bromo-5-methylhex-2-enoate ( <b>3k</b> ).....                     | S9  |
| Ethyl (Z)-2-Fluoro-3-cyclohexylacrylate ( <b>3l</b> ).....                    | S10 |
| (Z)-2-Chloro- <i>N,N</i> -diethyldec-2-enamide ( <b>5a</b> ).....             | S11 |
| (Z)-2-Chloro- <i>N,N</i> -diisopropyldec-2-enamide ( <b>5b</b> ).....         | S12 |
| 4-[(Z)-(1-Chlorocyclohex-1-en-1-yl)carbonyl]morpholine ( <b>5e</b> ).....     | S13 |
| 4-[(Z)-(1-Chloro-5-methylhex-1-en-1-yl)carbonyl]morpholine ( <b>5g</b> )..... | S14 |
| (Z)-2-Chloro- <i>N,N</i> -diethyl-4-methylhex-2-enamide ( <b>5h</b> ).....    | S15 |
| (Z)-2-Chloro- <i>N,N</i> -diethyltrideca-2,12-dienamide ( <b>5i</b> ).....    | S16 |
| (Z)-2-Chloro- <i>N,N</i> -diethyl-4-phenylpent-2-enamide ( <b>5j</b> ).....   | S17 |
| (Z)-1,3-Dichloro-4-cyclohexylbut-3-en-2-one ( <b>9c</b> ).....                | S18 |
| (Z)-5-Chloro-8-methylnona-1,5-dien-2-one ( <b>9d</b> ).....                   | S19 |
| (Z)-2-Chloro-3-cyclohexylacryl acid ( <b>10a</b> ).....                       | S20 |
| (Z)-2-Chloro-5-methylhex-2-enoic acid ( <b>10b</b> ).....                     | S21 |
| (Z)-2-Chloro-3-cyclohexylprop-2-en-1-ol ( <b>11b</b> ).....                   | S22 |

## GENERAL

All reactions involving organometallic or other moisture-sensitive reagents were carried out under a nitrogen or argon atmosphere using standard vacuum-line techniques and glassware that was flame dried and cooled under nitrogen before use. THF was distilled from sodium/benzophenone ketyl immediately prior to use. All other solvents were used as supplied (analytical or HPLC grade) without prior purification. All reagents were purchased in the highest quality available and were used without further purification. Organic layers were dried over Na<sub>2</sub>SO<sub>4</sub>. Thin layer chromatography was performed on aluminium plates coated with 60 F254 silica. Plates were visualised using UV light (254 nm), iodine, 1% aq. KMnO<sub>4</sub>, or 10% ethanolic phosphomolybdic acid. Flash column chromatography was performed on Kieselgel 60 silica. NMR spectra were recorded in the deuterated solvent stated and the field was locked by external referencing to the relevant deuterium resonance. <sup>1</sup>H NMR spectra were recorded on spectrometers at 300 or 400 MHz. <sup>13</sup>C NMR spectra and DEPT experiments were determined at 75 or 100 MHz. Unless otherwise noted NMR spectra are recorded at room temperature. Chemical shifts are given in ppm relative to tetramethylsilane (TMS), which is used as an internal standard. GC-MS and HRMS were measured at 70 eV. Only the most important IR absorptions (in cm<sup>-1</sup>) and the molecular ions and/or base peaks in MS are given.

**Ethyl (Z)-2-Chlorodec-2-enoate (3a):**  $^1\text{H}$  NMR (300 MHz,  $\text{CDCl}_3$ ):  $\delta$  7.08 (t,  $J = 6.8$  Hz, 1 H), 4.29 (q,  $J = 7.0$  Hz, 2 H), 2.42-2.32 (m, 2 H), 1.69-1.48 (m, 2 H), 1.37-1.24 (m, 11 H), 0.89 (t,  $J = 6.9$  Hz, 3 H);  $^{13}\text{C}$  NMR (100 MHz,  $\text{CDCl}_3$ ):  $\delta$  162.8 (C), 142.8 (CH), 125.9 (C), 63.0 ( $\text{CH}_2$ ), 32.6 ( $\text{CH}_2$ ), 30.3 ( $\text{CH}_2$ ), 30.2 ( $\text{CH}_2$ ), 29.9 ( $\text{CH}_2$ ), 28.6 ( $\text{CH}_2$ ), 23.5 ( $\text{CH}_2$ ), 15.3 ( $\text{CH}_3$ ), 14.9 ( $\text{CH}_3$ ); MS (70 eV, EI)  $m/z$  (%) 232 [ $M^+$ , 5], 137 (32), 135 (100), 122 (58), 107 (73); HRMS (70 eV) calc. for  $\text{C}_{12}\text{H}_{21}\text{ClO}_2$  232.1230, found 232.1227; IR (neat): 2928, 1750, 1267  $\text{cm}^{-1}$ ;  $R_f = 0.5$  (Hexane: EtOAc 10:1).

$^1\text{H}$  NMR (300 MHz)

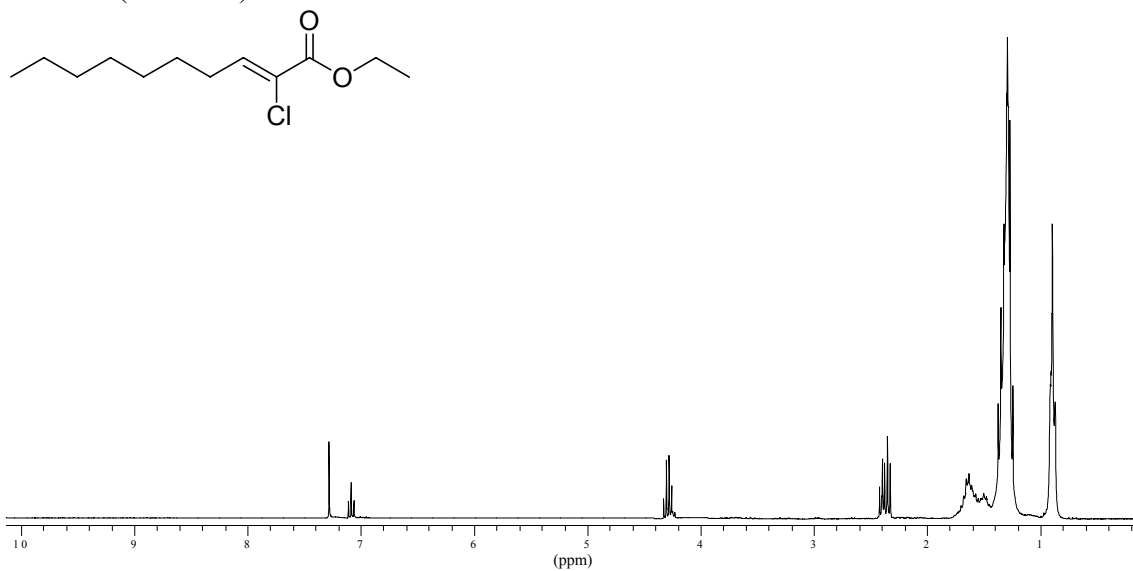

$^{13}\text{C}$  NMR (100 MHz)

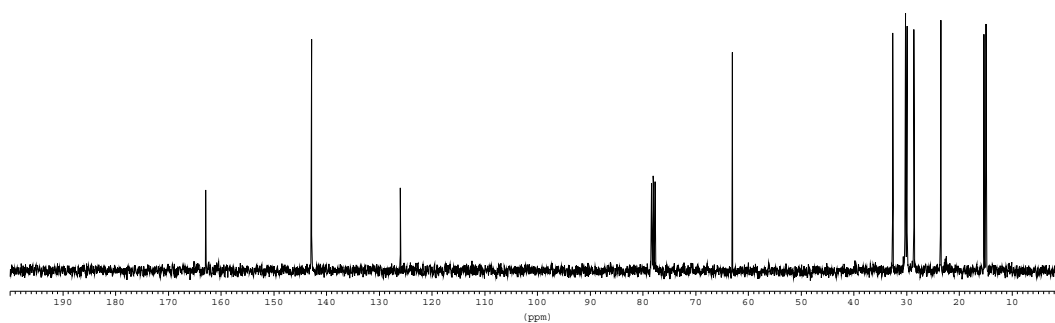

**Isopropyl (Z)-2-Chloro-3-cyclohexylacrylate (3d):**  $^1\text{H}$  NMR (400 MHz,  $\text{CDCl}_3$ ):  $\delta$  6.86 (d,  $J = 9.3$  Hz, 1 H), 5.18-5.02 (m, 1 H), 2.69-2.52 (m, 1 H), 1.81-1.72 (m, 2 H), 1.39-1.18 (m, 8 H), 1.31 (d,  $J = 6.4$  Hz, 6 H);  $^{13}\text{C}$  NMR (100 MHz,  $\text{CDCl}_3$ ):  $\delta$  162.3 (C), 146.3 (CH), 123.2 (C), 69.8 (CH), 38.5 (CH), 30.9 (2 x  $\text{CH}_2$ ), 25.7 ( $\text{CH}_2$ ), 25.3 (2 x  $\text{CH}_2$ ), 21.7 (2 x  $\text{CH}_3$ ); MS (70 eV, EI)  $m/z$  (%) 230 [ $M^+$ , 2], 188 (64), 82 (100), 67 (66), 55 (16); HRMS (70 eV) calc. for  $\text{C}_{12}\text{H}_{19}\text{ClO}_2$  230.1074, found 230.1084; IR (neat): 2982, 1729, 1628, 1145  $\text{cm}^{-1}$ ;  $R_f = 0.39$  (Hexane: EtOAc 20:1).

$^1\text{H}$  NMR (400 MHz)

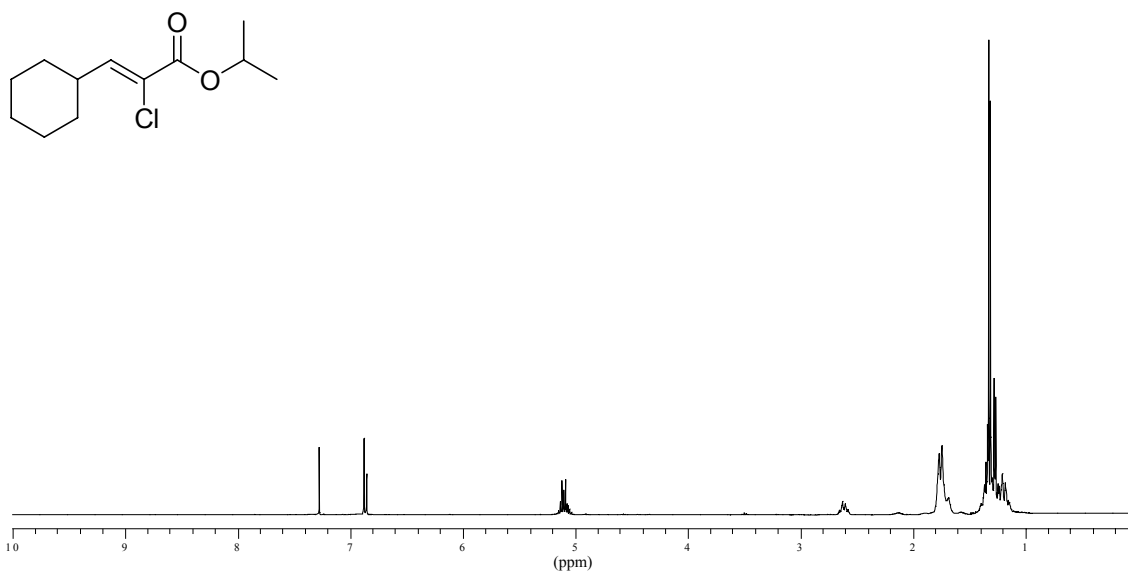

$^{13}\text{C}$  NMR (100 MHz)

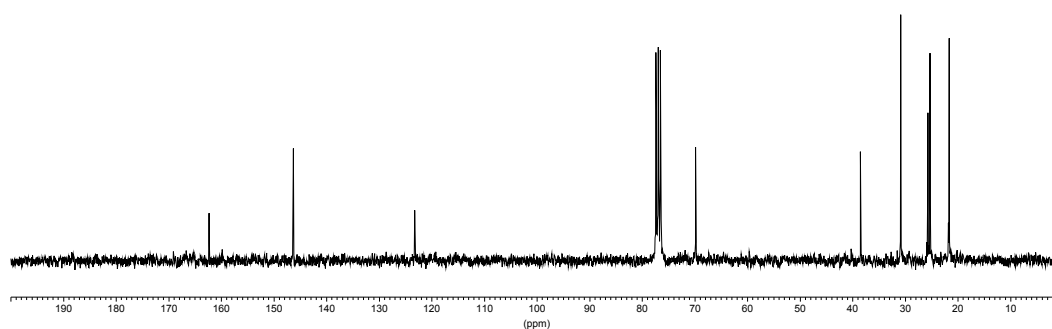

**Ehtyl (Z)-2-Chloro-4-methylhex-2-enoate (3f):**  $^1\text{H}$  NMR (300 MHz,  $\text{CDCl}_3$ ):  $\delta$  6.87 (d,  $J = 9.6$  Hz, 1 H), 4.29 (q,  $J = 7.1$  Hz, 2 H), 2.87-2.59 (m, 1 H), 1.49-1.33 (m, 2 H), 1.23 (t,  $J = 7.0$  Hz, 3 H), 1.07 (d,  $J = 6.8$  Hz, 3 H), 0.91 (t,  $J = 7.4$  Hz, 3 H);  $^{13}\text{C}$  NMR (75 MHz,  $\text{CDCl}_3$ ):  $\delta$  163.9 (C), 147.4 (CH), 130.6 (C), 62.1 ( $\text{CH}_2$ ), 35.9 (CH), 28.9 ( $\text{CH}_2$ ), 18.6 ( $\text{CH}_3$ ), 14.1 ( $\text{CH}_3$ ), 11.6 ( $\text{CH}_3$ ); MS (70 eV, EI)  $m/z$  (%) 190 [ $M^+$ , 8], 225 (36), 179 (28), 69 (100); HRMS (70 eV) calc. for  $\text{C}_9\text{H}_{15}\text{ClO}_2$  190.0761, found 190.0769; IR (neat): 3415, 1645, 1263  $\text{cm}^{-1}$ ;  $R_f = 0.37$  (Hexane: EtOAc 10:1).

$^1\text{H}$  NMR (300 MHz)

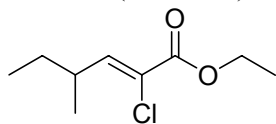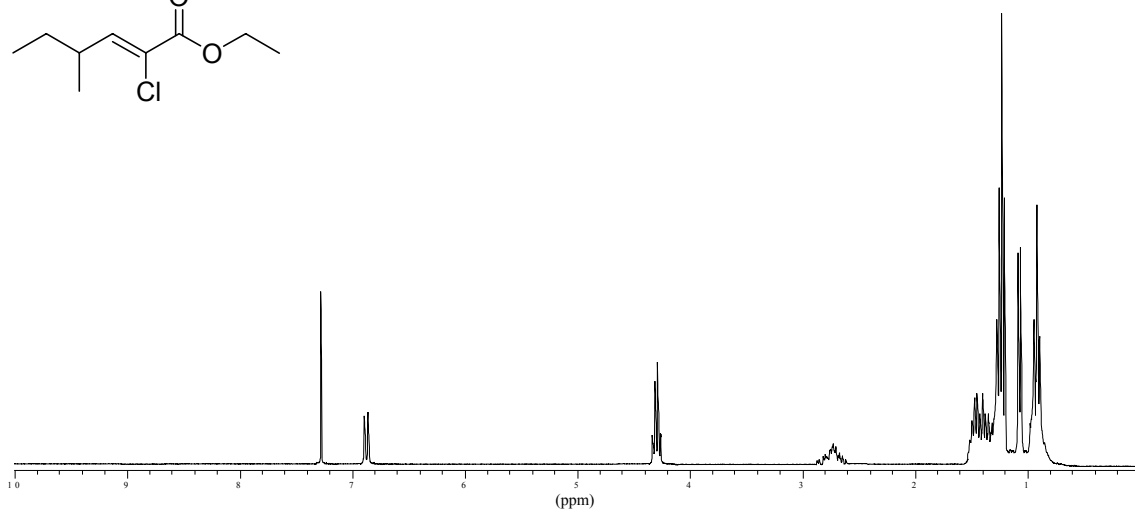

$^{13}\text{C}$  NMR (75 MHz)

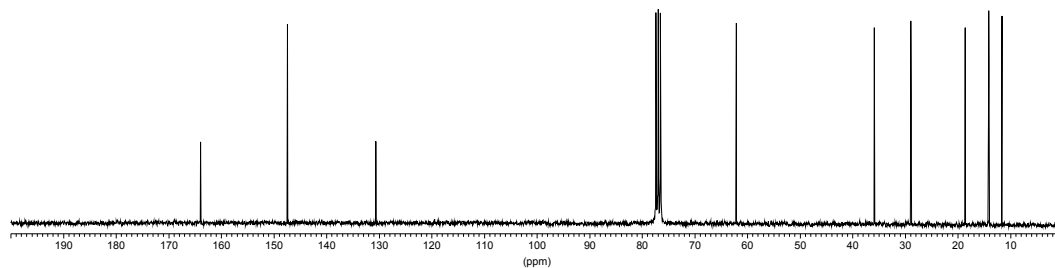

**Ethyl (Z)-2-Chlorotrideca-2,12-dienoate (3g):**  $^1\text{H}$  NMR (300 MHz,  $\text{CDCl}_3$ ):  $\delta$  7.07 (t,  $J = 7.5$  Hz, 1 H), 5.97-5.74 (m, 1 H), 5.04-4.93 (m, 2 H), 4.14 (q,  $J = 6.9$  Hz, 2 H), 2.43-2.24 (m, 2 H), 2.10-2.00 (m, 2 H), 1.70-1.55 (m, 2 H), 1.44-1.25 (m, 13 H);  $^{13}\text{C}$  NMR (75 MHz,  $\text{CDCl}_3$ ):  $\delta$  161.7 (C), 142.4 (C), 139.1 (CH), 126.7 (CH), 114.1 ( $\text{CH}_2$ ), 60.1 ( $\text{CH}_2$ ), 33.7 ( $\text{CH}_2$ ), 29.3 ( $\text{CH}_2$ ), 29.2 ( $\text{CH}_2$ ), 29.1 ( $\text{CH}_2$ ), 29.0 ( $\text{CH}_2$ ), 28.8 ( $\text{CH}_2$ ), 28.6 ( $\text{CH}_2$ ), 24.9 ( $\text{CH}_2$ ), 14.2 ( $\text{CH}_3$ ); MS (70 eV, EI)  $m/z$  (%) 272 [ $M^+$ , 8], 135 (100), 107 (66), 69 (86); HRMS (70 eV) calc. for  $\text{C}_{15}\text{H}_{25}\text{ClO}_2$  272.1543, found 272.1524; IR (neat): 2928, 2853, 1737, 1641  $\text{cm}^{-1}$ ;  $R_f = 0.42$  (Hexane: EtOAc 10:1).

$^1\text{H}$  NMR (300 MHz)

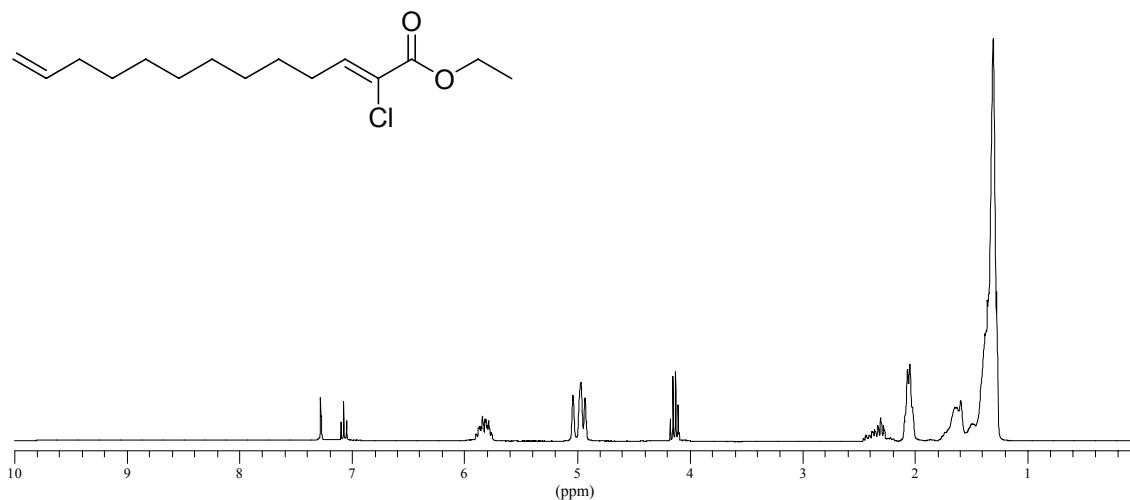

$^{13}\text{C}$  NMR (75 MHz)

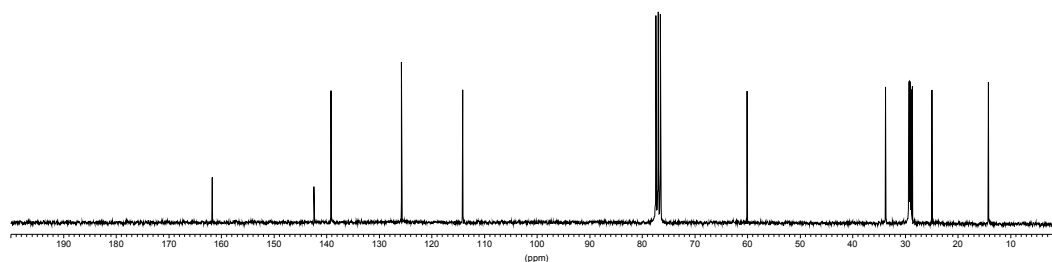

**Ethyl (Z)-2-Chloro-3-(4-methoxyphenyl)acrylate (3h):**  $^1\text{H}$  NMR (300 MHz,  $\text{CDCl}_3$ ):  $\delta$  7.89 (d,  $J = 8.6$  Hz, 2 H), 7.89 (s, 1 H), 6.96 (d,  $J = 8.7$  Hz, 2 H), 4.36 (q,  $J = 7.1$  Hz, 2 H), 3.90 (s, 3 H), 1.40 (t,  $J = 7.1$  Hz, 3 H);  $^{13}\text{C}$  NMR (75 MHz,  $\text{CDCl}_3$ ):  $\delta$  163.7 (C), 161.6 (C), 136.4 (CH), 132.6 (2 x CH), 130.2 (C), 126.9 (C), 113.9 (2 x CH), 62.3 ( $\text{CH}_2$ ), 55.3 ( $\text{CH}_3$ ), 14.2 ( $\text{CH}_3$ ); MS (70 eV, EI)  $m/z$  (%) 240 [ $M^+$ , 100], 177 (20), 132 (70), 89 (10); HRMS (70 eV) calc. for  $\text{C}_{12}\text{H}_{13}\text{ClO}_3$  240.0553, found 240.0505; IR (neat): 3055, 1717, 1603, 738  $\text{cm}^{-1}$ ;  $R_f = 0.32$  (Hexane: EtOAc 10:1).

$^1\text{H}$  NMR (300 MHz)

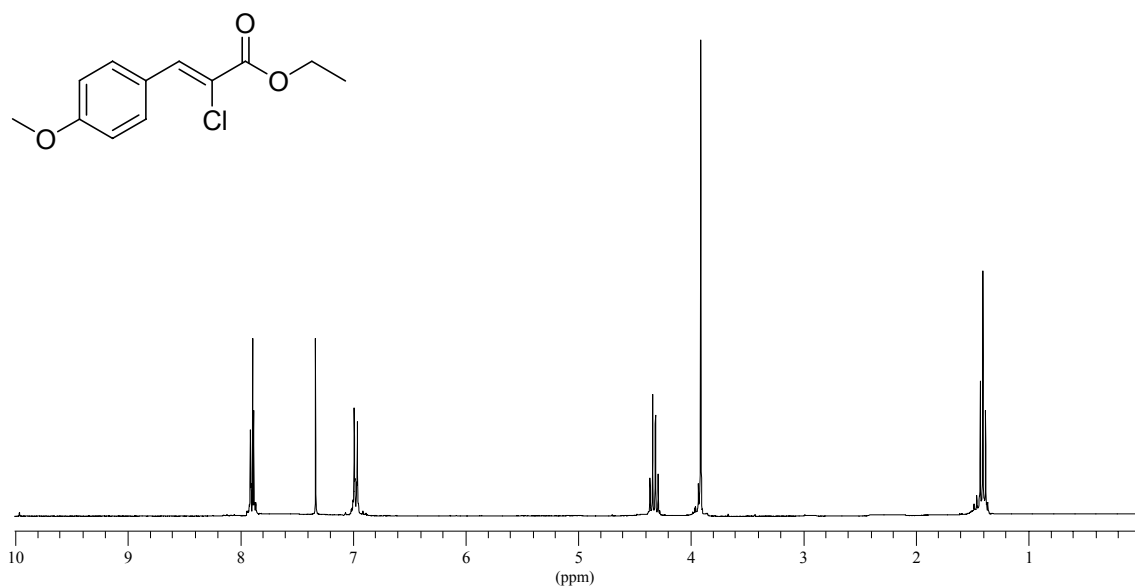

$^{13}\text{C}$  NMR (75 MHz)

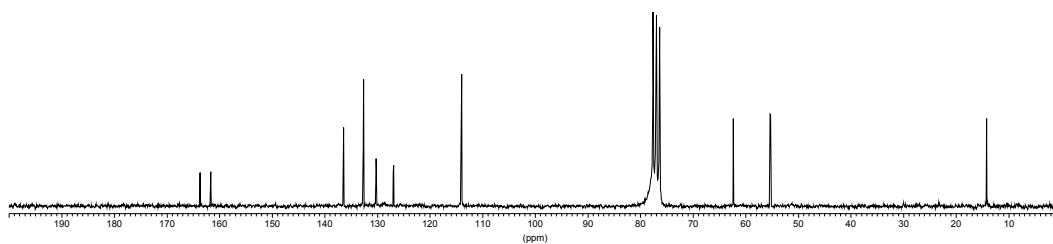

**Isopropyl (Z)-2-Bromo-3-cyclohexylacrylate (3j):**  $^1\text{H}$  NMR (400 MHz,  $\text{CDCl}_3$ ):  $\delta$  7.04 (d,  $J = 7.8$  Hz, 1 H), 5.17-5.09 (m, 1 H), 2.60-2.51 (m, 1 H), 1.75-1.66 (m, 2 H), 1.37 (d,  $J = 6.0$  Hz, 6 H), 1.35-1.14 (m, 8 H);  $^{13}\text{C}$  NMR (100 MHz,  $\text{CDCl}_3$ ):  $\delta$  162.0 (C), 149.7 (CH), 114.6 (C), 70.0 (CH), 40.9 (CH), 30.5 (2 x  $\text{CH}_2$ ), 25.6 ( $\text{CH}_2$ ), 25.1 (2 x  $\text{CH}_2$ ), 21.5 ( $\text{CH}_3$ ), 21.3 ( $\text{CH}_3$ ); MS (70 eV, EI)  $m/z$  (%) 274 [ $M^+$ , < 1], 225 (42), 183 (100), 165 (68), 101 (27); HRMS (70 eV) calc. for  $\text{C}_{12}\text{H}_{19}\text{BrO}_2$  274.0568, found 274.0659; IR (neat): 2929, 1726, 1450, 1264  $\text{cm}^{-1}$ ;  $R_f = 0.62$  (Cyclohexane: EtOAc 30:1).

$^1\text{H}$  NMR (400 MHz)

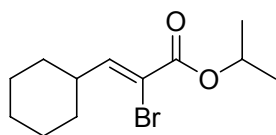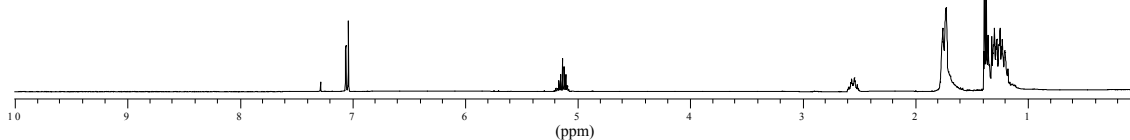

$^{13}\text{C}$  NMR (100 MHz)

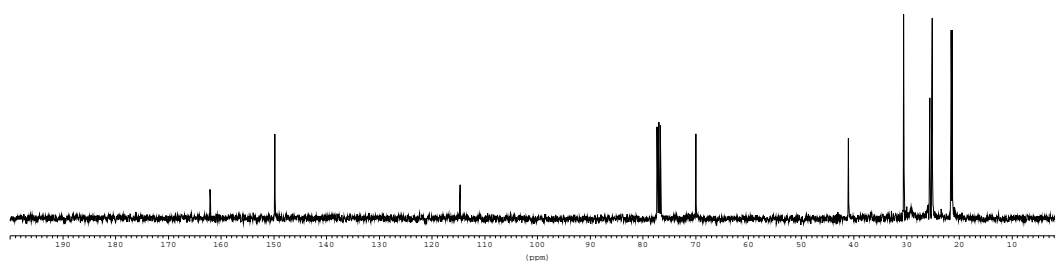



**Ethyl (Z)-2-Bromo-5-methylhex-2-enoate (3k):**  $^1\text{H}$  NMR (300 MHz,  $\text{CDCl}_3$ ):  $\delta$  6.77 (t,  $J = 7.5$  Hz, 1 H), 4.24 (q,  $J = 7.2$  Hz, 2 H), 2.22-2.02 (m, 1 H), 1.87-1.72 (m, 2 H), 1.33 (t,  $J = 7.2$  Hz, 3 H), 0.97 (d,  $J = 5.7$  Hz, 3 H), 0.95 (d,  $J = 5.6$  Hz, 3 H);  $^{13}\text{C}$  NMR (100 MHz,  $\text{CDCl}_3$ ):  $\delta$  167.6 (C), 142.2 (CH), 134.0 (C), 60.5 ( $\text{CH}_2$ ), 42.5 ( $\text{CH}_2$ ), 28.3 (CH), 22.6 ( $\text{CH}_3$ ), 22.4 ( $\text{CH}_3$ ), 14.1 ( $\text{CH}_3$ ); MS (70 eV, EI)  $m/z$  (%) 205 [ $M^+$  - Et, 10], 139 (77), 118 (72), 69 (100), 55 (32); HRMS (70 eV) calc. for [ $\text{C}_9\text{H}_{15}\text{BrO}_2$  - Et] 204.9864, found 204.9888; IR (neat): 2995, 1745, 1472  $\text{cm}^{-1}$ ;  $R_f = 0.55$  (Cyclohexane: EtOAc 30:1).

$^1\text{H}$  NMR (300 MHz)

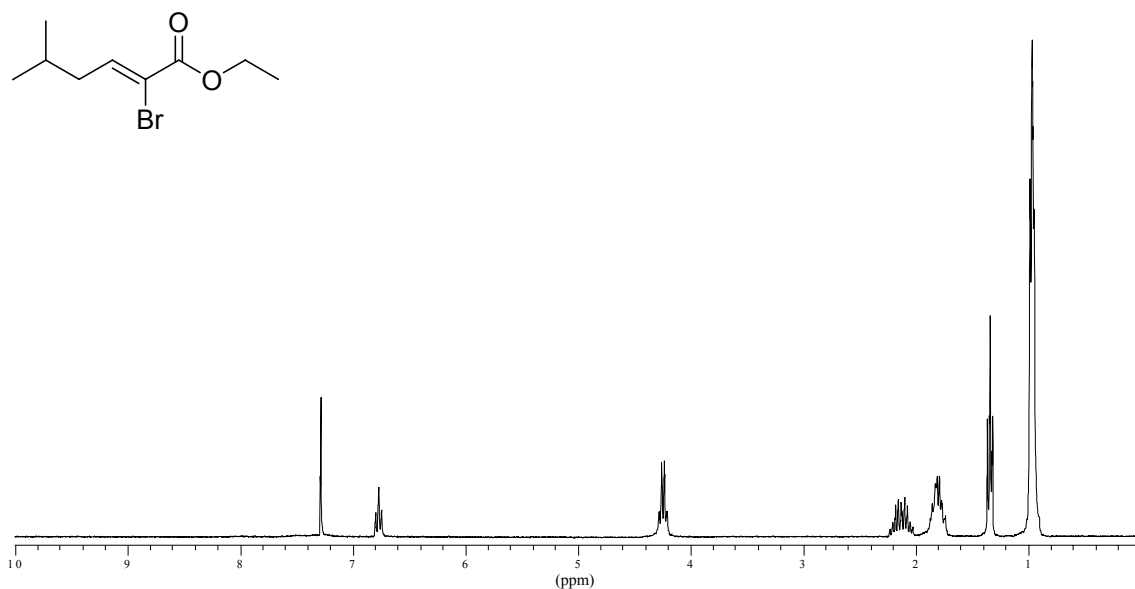

$^{13}\text{C}$  NMR (100 MHz)

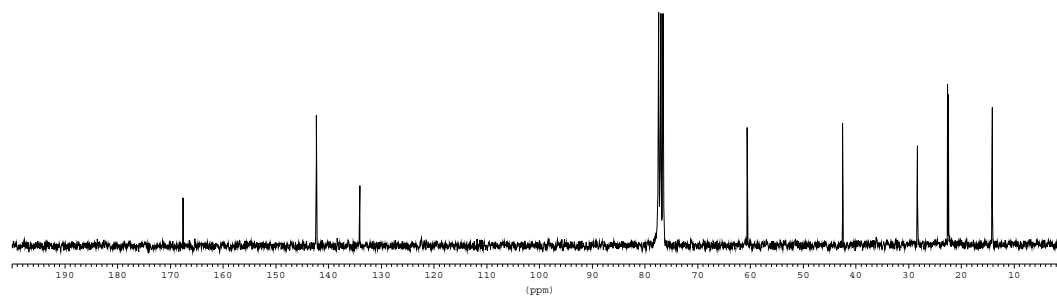

**Ethyl (Z)-2-Fluorocyclohexyl-2-enoate (3l):**  $^1\text{H}$  NMR (400 MHz,  $\text{CDCl}_3$ ):  $\delta$  6.01 (dd,  $J = 34.2, 9.6$  Hz, 1 H), 4.43 (q,  $J = 6.8$  Hz, 2 H), 2.61-2.53 (m, 1 H), 1.94-1.84 (m, 2 H), 1.74-1.63 (m, 4 H), 1.41 (t,  $J = 6.8$  Hz, 3 H), 1.34-1.11 (m, 4 H);  $^{13}\text{C}$  NMR (100 MHz,  $\text{CDCl}_3$ ):  $\delta$  161.9 (C), 146.5 (d,  $J = 253.5$  Hz, C), 125.5 (d,  $J = 11.7$  Hz, CH), 64.7 ( $\text{CH}_2$ ), 33.9 (CH), 31.9 (2 x  $\text{CH}_2$ ), 25.7 ( $\text{CH}_2$ ), 25.3 (2 x  $\text{CH}_2$ ), 13.6 ( $\text{CH}_3$ ); MS (70 eV, EI)  $m/z$  (%) 200 [ $M^+$ , 28], 81 (100), 67 (83), 55 (59); HRMS (70 eV) calc. for  $\text{C}_{11}\text{H}_{17}\text{FO}_2$  200.1213, found 200.1223; IR (neat): 1729, 1265, 740  $\text{cm}^{-1}$ ;  $R_f = 0.20$  (Hexane: EtOAc 20:1).

$^1\text{H}$  NMR (400 MHz)

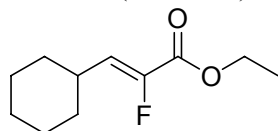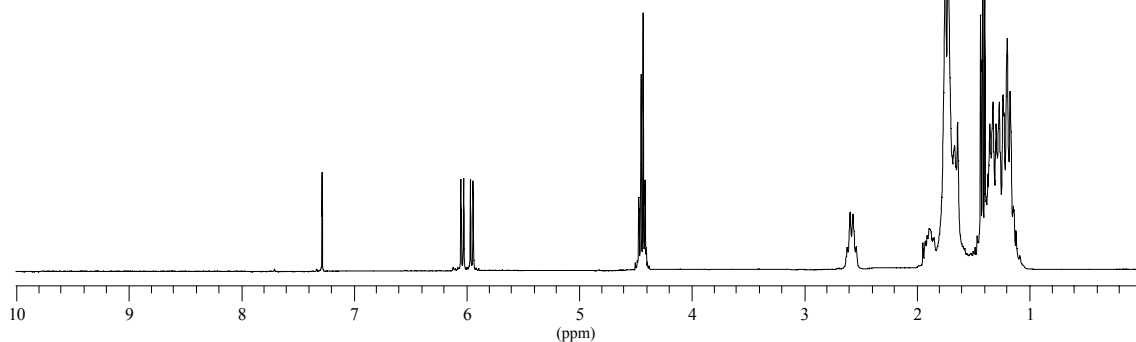

$^{13}\text{C}$  NMR (100 MHz)

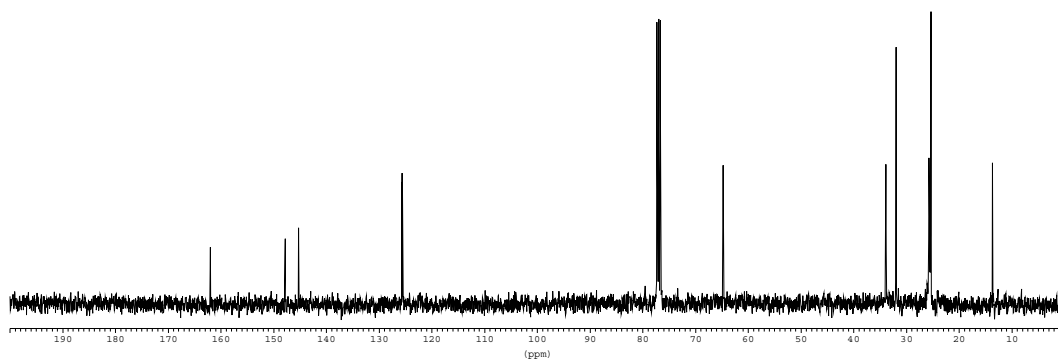

**(Z)-2-Chloro-N,N-diethyldec-2-enamide (5a):**  $^1\text{H}$  NMR (400 MHz,  $\text{CDCl}_3$ ):  $\delta$  5.96 (t,  $J = 7.1$  Hz, 1 H), 3.41-3.33 (m, 4 H), 2.24 (apparent q,  $J = 7.2$  Hz, 2 H), 1.41-1.39 (m, 2 H), 1.25-1.15 (m, 8 H), 1.19 (t,  $J = 7.1$  Hz, 3 H), 1.15 (t,  $J = 7.1$  Hz, 3 H), 0.85 (t,  $J = 6.9$  Hz, 3 H);  $^{13}\text{C}$  NMR (100 MHz,  $\text{CDCl}_3$ , 233 K):  $\delta$  165.8 (C), 131.0 (CH), 124.3 (C), 42.8 ( $\text{CH}_2$ ), 38.8 ( $\text{CH}_2$ ), 31.7 (2 x  $\text{CH}_2$ ), 29.1 ( $\text{CH}_2$ ), 27.8 ( $\text{CH}_2$ ), 22.6 (2 x  $\text{CH}_2$ ), 14.2 ( $\text{CH}_3$ ), 13.9 ( $\text{CH}_3$ ), 12.3 ( $\text{CH}_3$ ); MS (70 eV, EI)  $m/z$  (%) 259 [ $M^+$ , 15], 224 (100), 187 (32), 160 (79); HRMS (70 eV) calc. for  $\text{C}_{14}\text{H}_{26}\text{ClNO}$  259.1703, found 259.1727; IR (neat): 3451, 2974, 1642, 1460  $\text{cm}^{-1}$ ;  $R_f = 0.52$  (Hexane: EtOAc 3:1).

$^1\text{H}$  NMR (400 MHz)

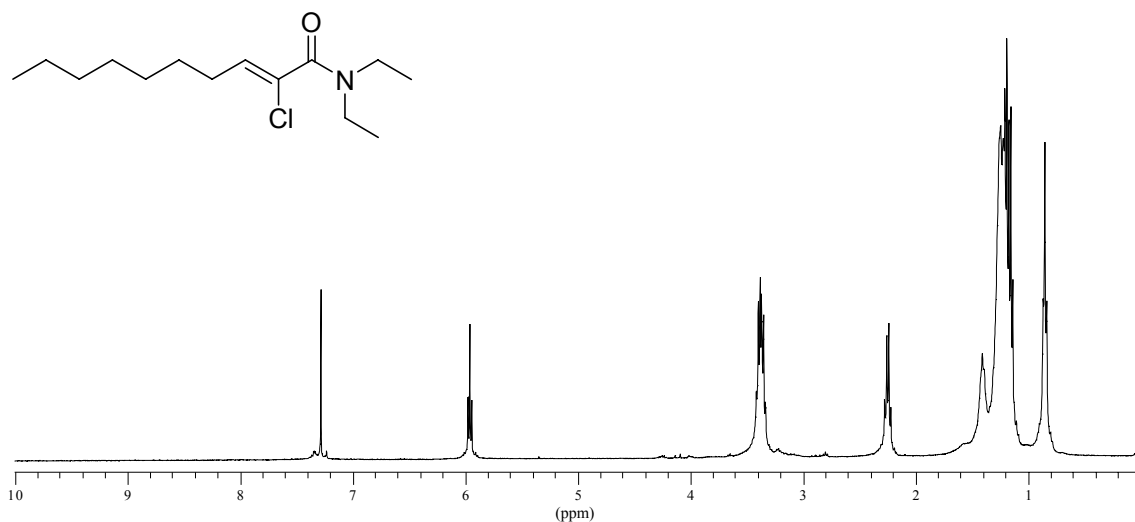

$^{13}\text{C}$  NMR (100 MHz, 233 K)

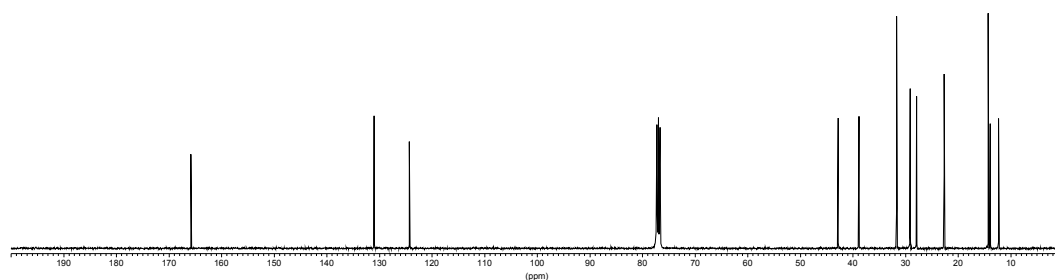

**(Z)-2-Chloro-N,N-diisopropyldec-2-enamide (5b):**  $^1\text{H}$  NMR (400 MHz,  $\text{CDCl}_3$ , 233 K):  $\delta$  5.81 (t,  $J = 7.2$  Hz, 1 H), 4.02-3.95 (m, 1 H), 3.80-3.40 (m, 1 H), 2.11 (apparente q,  $J = 6.8$  Hz, 2 H), 1.40-1.09 (m, 10 H), 1.30 (d,  $J = 5.8$  Hz, 6 H), 1.17 (d,  $J = 6.0$  Hz, 6 H), 0.81 (m, 3 H);  $^{13}\text{C}$  NMR (100 MHz,  $\text{CDCl}_3$ , 233 K):  $\delta$  165.4 (C), 129.3 (CH), 126.7 (C), 48.0 (CH), 44.2 (CH), 31.6 ( $\text{CH}_2$ ), 29.5 ( $\text{CH}_2$ ), 29.0 ( $\text{CH}_2$ ), 28.8 ( $\text{CH}_2$ ), 22.5 ( $\text{CH}_2$ ), 20.5 (2 x  $\text{CH}_3$ ), 20.2 ( $\text{CH}_2$ ), 20.0 (2 x  $\text{CH}_3$ ), 13.9 ( $\text{CH}_3$ ); MS (70 eV, EI)  $m/z$  (%) 287 [ $M^+$ , 8], 252 (100), 201 (41); HRMS (70 eV) calc. for  $\text{C}_{16}\text{H}_{30}\text{ClNO}$  287.2016, found 287.2025; IR (neat): 3444, 2927, 1643, 1431  $\text{cm}^{-1}$ ;  $R_f = 0.55$  (Hexane: EtOAc 10:1).

$^1\text{H}$  NMR (400 MHz, 233 K)

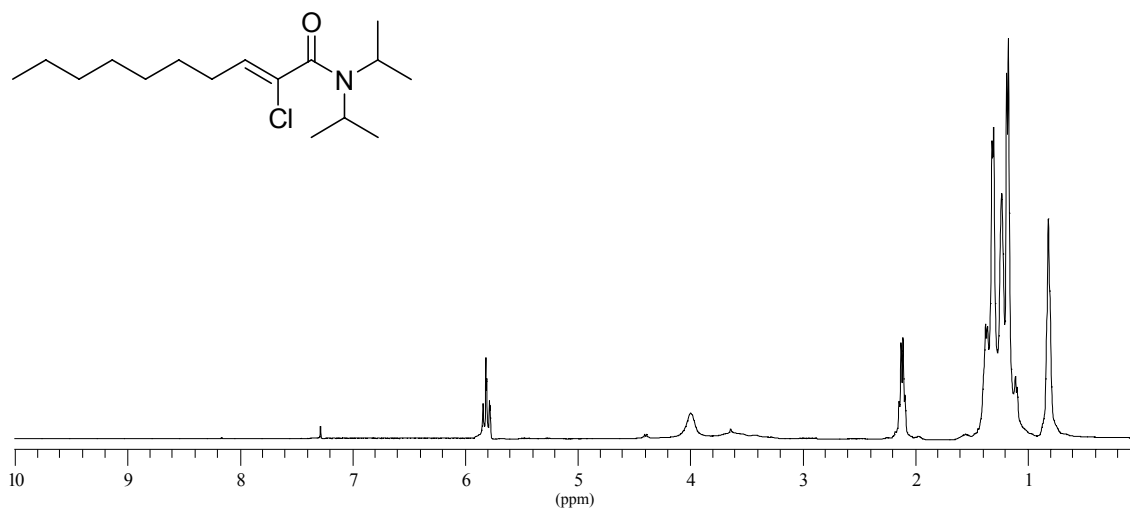

$^{13}\text{C}$  NMR (100 MHz, 233 K)

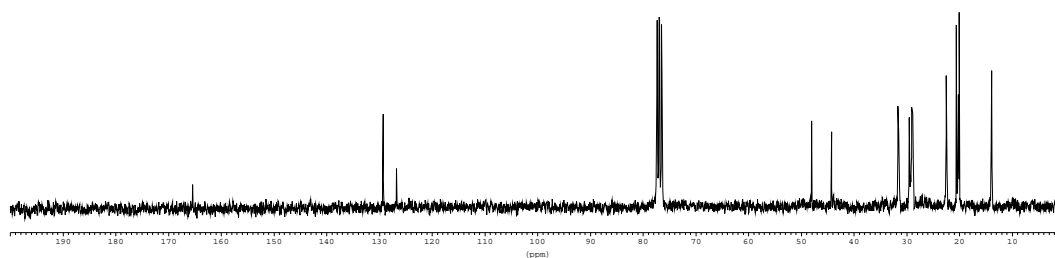

**4-[(Z)-(1-Chlorocyclohex-1-en-1-yl)carbonyl]morpholine (5e):**  $^1\text{H}$  NMR (300 MHz,  $\text{CDCl}_3$ ):  $\delta$  5.86 (d,  $J = 9.0$  Hz, 1 H), 3.72-3.60 (m, 4 H), 3.54-3.44 (m, 4 H), 1.91-1.81 (m, 1 H), 1.71-1.60 (m, 2 H), 1.33-1.11 (m, 4 H), 1.03-0.91 (m, 4 H);  $^{13}\text{C}$  NMR (75 MHz,  $\text{CDCl}_3$ ):  $\delta$  165.1 (C), 137.8 (CH), 122.4 (C), 66.6 ( $\text{CH}_2$ ), 66.4 ( $\text{CH}_2$ ), 47.4 ( $\text{CH}_2$ ), 45.9 ( $\text{CH}_2$ ), 41.6 (CH), 32.9 (4 x  $\text{CH}_2$ ), 25.7 ( $\text{CH}_2$ ); MS (70 eV, EI)  $m/z$  (%) 257 [ $M^+$ , 14], 135 (26), 86 (50), 56 (88), 41 (100); HRMS (70 eV) calc. for  $\text{C}_{13}\text{H}_{20}\text{ClNO}_2$  257.1183, found 257.1139; IR (neat): 2926, 1712, 1642, 1448  $\text{cm}^{-1}$ ;  $R_f = 0.57$  (Hexane: EtOAc 10:1).

$^1\text{H}$  NMR (300 MHz)

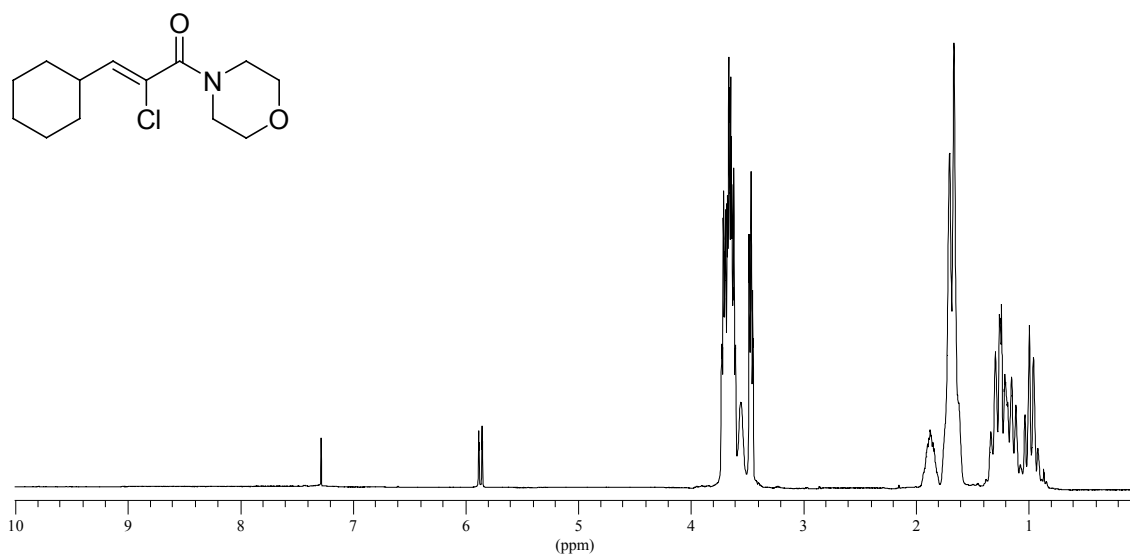

$^{13}\text{C}$  NMR (75 MHz)

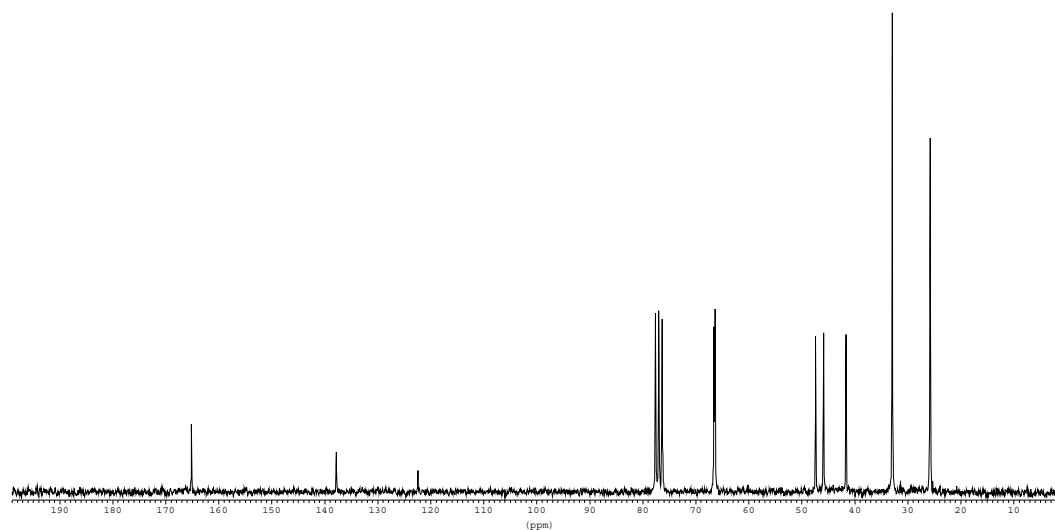

**4-[(Z)-(1-Chloro-5-methylhex-1-en-1-yl)carbonyl]morpholine (5g):**  $^1\text{H}$  NMR (400 MHz,  $\text{CDCl}_3$ ):  $\delta$  6.07 (t,  $J = 7.4$  Hz, 1 H), 3.72-3.53 (m, 8 H), 2.14 (apparent t,  $J = 7.2$  Hz, 2 H), 1.78-1.68 (m, 1 H), 0.89 (d,  $J = 6.6$  Hz, 6 H);  $^{13}\text{C}$  NMR (100 MHz,  $\text{CDCl}_3$ , 233 K):  $\delta$  165.0 (C), 132.5 (CH), 124.3 (C), 66.5 ( $\text{CH}_2$ ), 66.3 ( $\text{CH}_2$ ), 47.2 (CH), 42.1 ( $\text{CH}_2$ ), 36.7 ( $\text{CH}_2$ ), 27.6 ( $\text{CH}_2$ ), 22.3 (2 x  $\text{CH}_3$ ); MS (70 eV, EI)  $m/z$  (%) 231 [ $M^+$ , 20], 216 (32), 196 (36), 174 (86), 86 (100); HRMS (70 eV) calc. for  $\text{C}_{11}\text{H}_{18}\text{ClNO}_2$  231.1020, found 231.1021; IR (neat): 2959, 1641, 1439, 1116  $\text{cm}^{-1}$ ;  $R_f = 0.25$  (Hexane: EtOAc 3:1).

$^1\text{H}$  NMR (400 MHz)

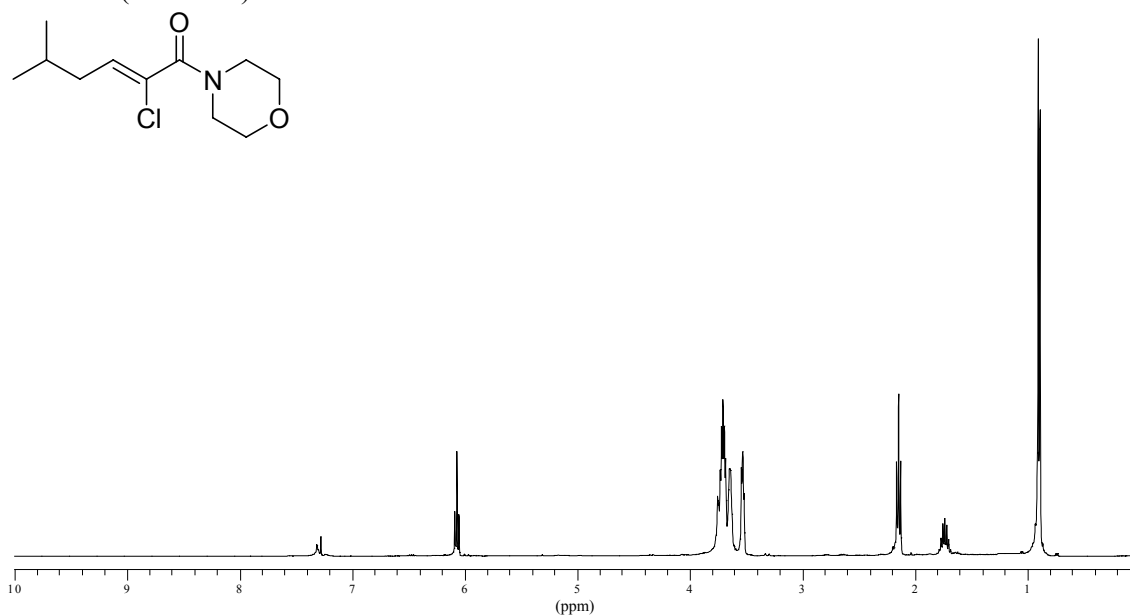

$^{13}\text{C}$  NMR (100 MHz, 233 K)

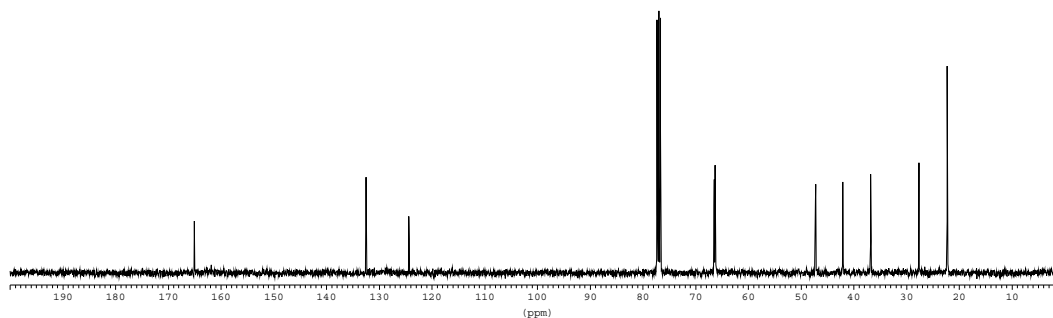

**(Z)-2-Chloro-N,N-diethyl-4-methylhex-2-enamide (5h):**  $^1\text{H}$  NMR (300 MHz,  $\text{CDCl}_3$ ):  $\delta$  5.73 (d,  $J = 9.4$  Hz, 1 H), 3.41 (q,  $J = 7.1$  Hz, 4 H), 2.71-2.61 (m, 1 H), 1.48-1.39 (m, 2 H), 1.19 (t,  $J = 7.1$  Hz, 6 H), 1.05 (d,  $J = 6.7$  Hz, 3 H), 0.93 (t,  $J = 7.4$  Hz, 3 H);  $^{13}\text{C}$  NMR (100 MHz,  $\text{CDCl}_3$ , 233 K):  $\delta$  164.1 (C), 136.0 (CH), 123.8 (C), 42.9 ( $\text{CH}_2$ ), 39.1 ( $\text{CH}_2$ ), 34.6 (CH), 29.1 ( $\text{CH}_2$ ), 19.2 ( $\text{CH}_3$ ), 14.0 ( $\text{CH}_3$ ), 12.4 ( $\text{CH}_3$ ), 11.9 ( $\text{CH}_3$ ); MS (70 eV, EI)  $m/z$  (%) 217 [ $M^+$ , 50], 182 (99), 160 (100), 145 (68); HRMS (70 eV) calc. for  $\text{C}_{11}\text{H}_{20}\text{ClNO}$  217.1233, found 217.1222; IR (neat): 3511, 2949, 1643, 1458  $\text{cm}^{-1}$ ;  $R_f = 0.41$  (Hexane: EtOAc 3:1).

$^1\text{H}$  NMR (300 MHz)

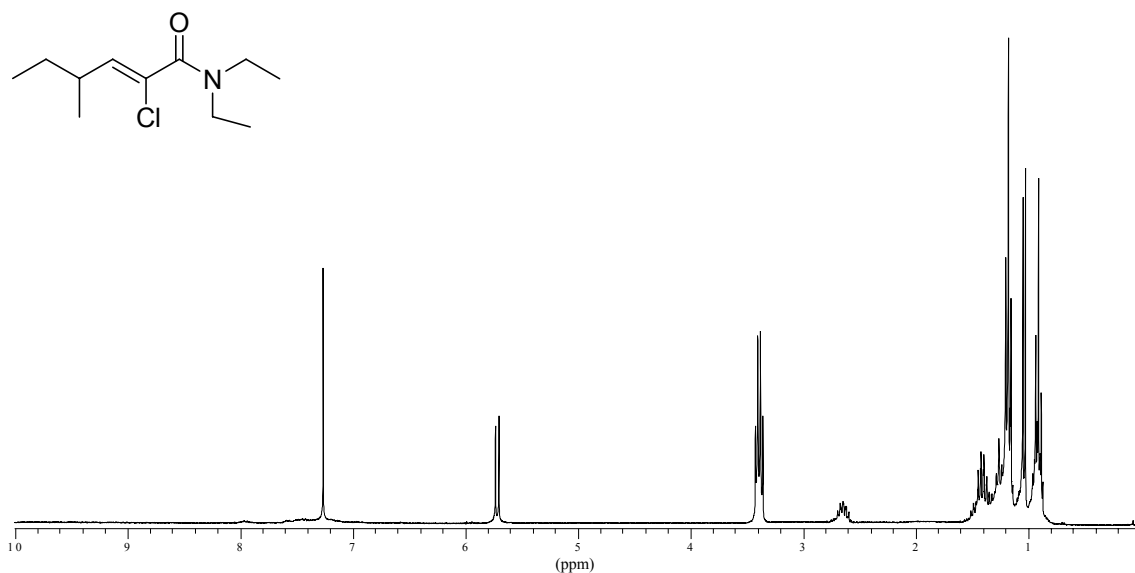

$^{13}\text{C}$  NMR (100 MHz, 233 K)

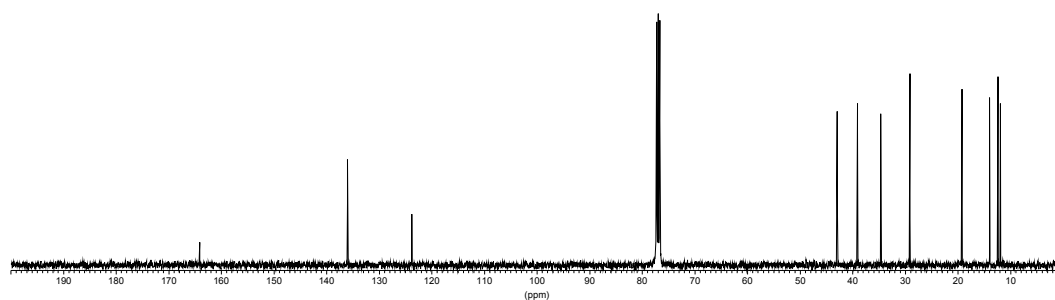

**(Z)-2-Chloro-N,N-diethyltrideca-2,12-dienamide (5i):**  $^1\text{H}$  NMR (400 MHz,  $\text{CDCl}_3$ ):  $\delta$  5.94 (t,  $J = 7.1$  Hz, 1 H), 5.84-5.75 (m, 1 H), 5.01-4.89 (m, 2 H), 3.42-3.30 (m, 4 H), 2.25-2.20 (m, 2 H), 2.04-1.96 (m, 2 H), 1.42-1.10 (m, 12 H), 1.17 (t,  $J = 6.9$  Hz, 3 H), 1.13 (t,  $J = 7.0$  Hz, 3 H);  $^{13}\text{C}$  NMR (100 MHz,  $\text{CDCl}_3$ , 233 K):  $\delta$  166.2 (C), 139.8 (CH), 131.3 (CH), 124.7 (C), 114.4 ( $\text{CH}_2$ ), 43.2 ( $\text{CH}_2$ ), 39.2 ( $\text{CH}_2$ ), 34.2 ( $\text{CH}_2$ ), 29.8 ( $\text{CH}_2$ ), 29.7 ( $\text{CH}_2$ ), 29.5 ( $\text{CH}_2$ ), 29.4 ( $\text{CH}_2$ ), 29.0 ( $\text{CH}_2$ ), 28.3 (2 x  $\text{CH}_2$ ), 14.3 ( $\text{CH}_3$ ), 12.7 ( $\text{CH}_3$ ); MS (70 eV, EI)  $m/z$  (%) 299 [ $M^+$ , 6], 264 (100), 160 (94), 41 (72); HRMS (70 eV) calc. for  $\text{C}_{17}\text{H}_{30}\text{ClNO}$  299.2016, found 299.2022; IR (neat): 3440, 2927, 1659, 1462  $\text{cm}^{-1}$ ;  $R_f = 0.42$  (Hexane: EtOAc 3:1).

$^1\text{H}$  NMR (400 MHz)

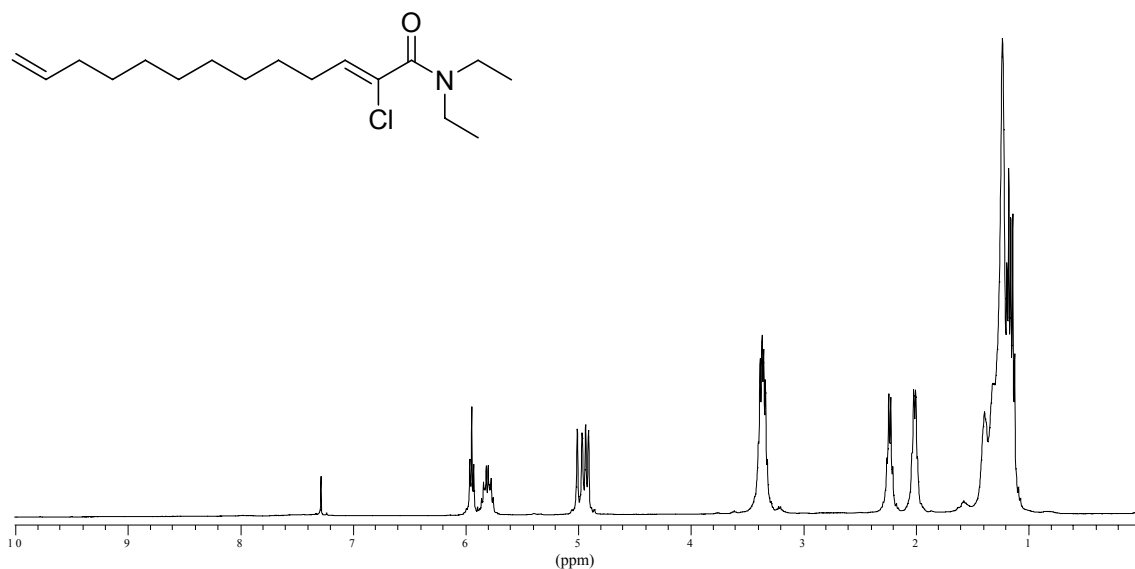

$^{13}\text{C}$  NMR (100 MHz, 233 K)

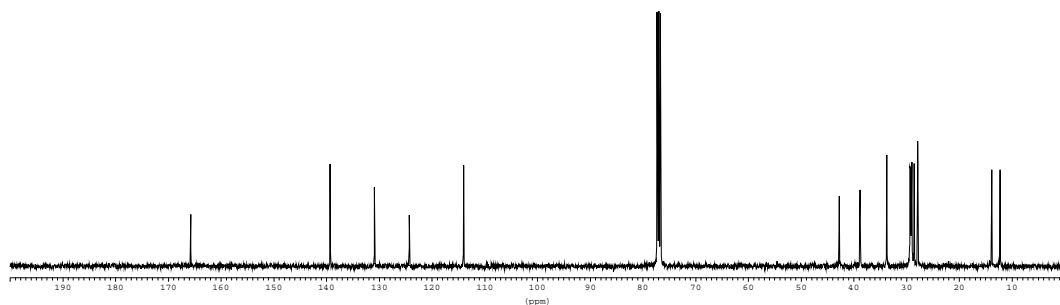



**(Z)-2-Chloro-N,N-diethyl-4-phenylpent-2-enamide (5j):**  $^1\text{H}$  NMR (400 MHz,  $\text{CDCl}_3$ , 233 K):  $\delta$  7.42-7.10 (m, 5 H), 5.94 (d,  $J = 9.2$  Hz, 1 H), 3.93-3.84 (m, 1 H), 3.28-3.19 (m, 2 H), 3.15-3.06 (m, 2 H), 1.29 (d,  $J = 6.8$  Hz, 3 H), 0.98 (t,  $J = 6.8$  Hz, 3 H), 0.96 (t,  $J = 6.8$  Hz, 3 H);  $^{13}\text{C}$  NMR (100 MHz,  $\text{CDCl}_3$ , 233 K):  $\delta$  165.2 (C), 143.1 (C), 134.4 (CH), 128.4 (2 x CH), 127.2 (C), 126.5 (2 x CH), 123.0 (CH), 42.7 (CH), 38.9 ( $\text{CH}_2$ ), 38.0 ( $\text{CH}_2$ ), 20.2 ( $\text{CH}_3$ ), 13.6 ( $\text{CH}_3$ ), 12.1 ( $\text{CH}_3$ ); MS (70 eV, EI)  $m/z$  (%) 265 [ $M^+$ , 47], 230 (100), 158 (98), 129 (89), 72 (71); HRMS (70 eV) calc. for  $\text{C}_{15}\text{H}_{20}\text{ClNO}$  265.1233, found 265.1191; IR (neat): 3425, 1615, 1451,  $701\text{cm}^{-1}$ ;  $R_f = 0.35$  (Hexane: EtOAc 3:1).

$^1\text{H}$  NMR (400 MHz, 233 K)

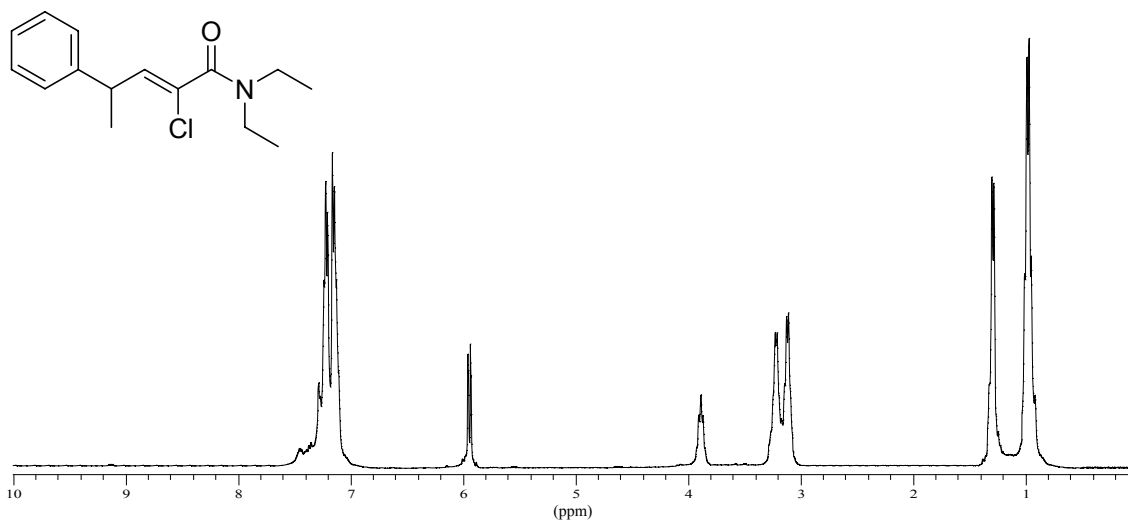

$^{13}\text{C}$  NMR (100 MHz, 233 K)

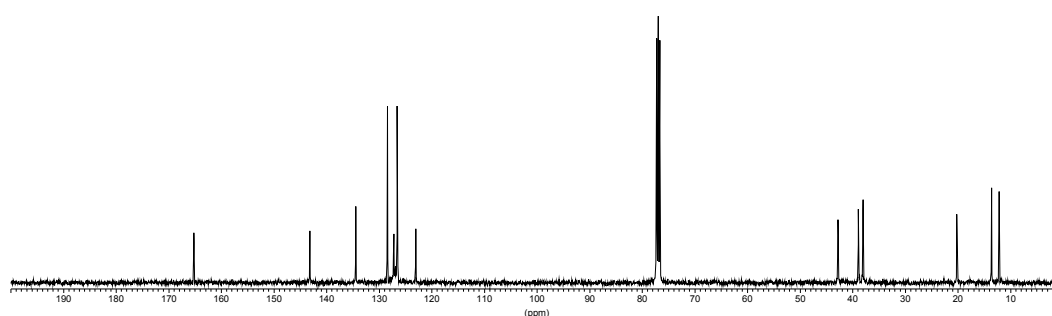

**(Z)-1,3-Dichloro-4-cyclohexylbut-3-en-2-one (9c):**  $^1\text{H}$  NMR (300 MHz,  $\text{CDCl}_3$ ):  $\delta$  6.92 (d,  $J$  = 9.3 Hz, 1 H), 4.56 (s, 2 H), 2.71-2.59 (m, 1 H), 1.79-1.59 (m, 4 H), 1.43-1.17 (m, 6 H);  $^{13}\text{C}$  NMR (75 MHz,  $\text{CDCl}_3$ ):  $\delta$  186.4 (C), 147.5 (CH), 128.2 (C), 46.4 ( $\text{CH}_2$ ), 38.6 (CH), 30.7 (2 x  $\text{CH}_2$ ), 25.6 ( $\text{CH}_2$ ), 25.1 (2 x  $\text{CH}_2$ ); MS (70 eV, EI)  $m/z$  (%) 220 [ $M^+$ , 18], 151 (10), 89 (15), 81 (100); HRMS (70 eV) calc. for  $\text{C}_{10}\text{H}_{14}\text{Cl}_2\text{O}$  220.0422, found 220.0413; IR (neat): 2932, 1711, 1266, 739  $\text{cm}^{-1}$ ;  $R_f$  = 0.22 (Hexane: EtOAc 20:1).

$^1\text{H}$  NMR (300 MHz)

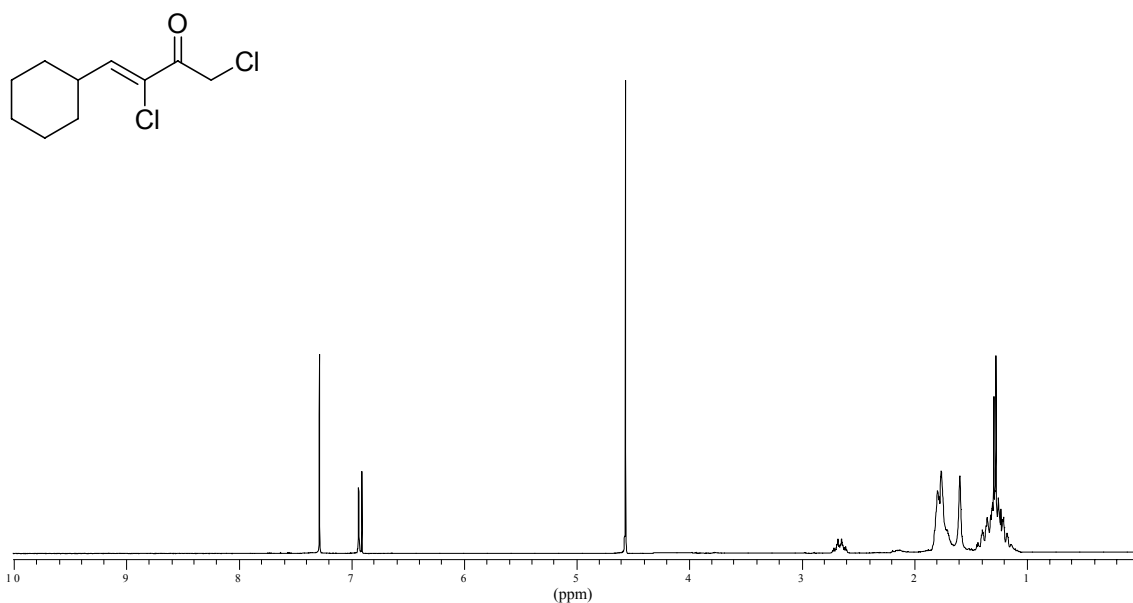

$^{13}\text{C}$  NMR (75 MHz)

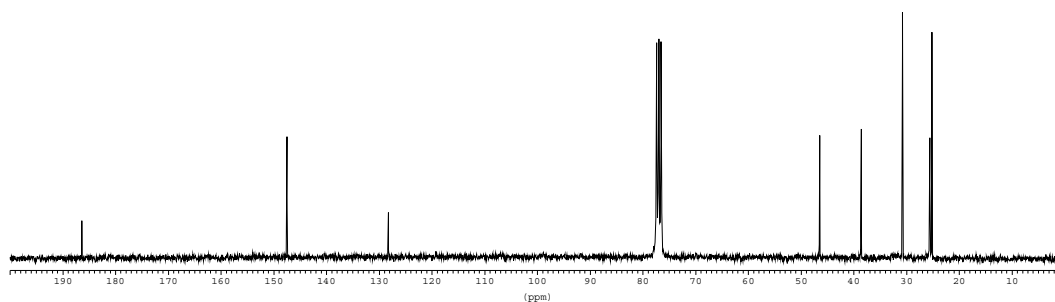

**(Z)-5-Chloro-8-methylnona-1,5-dien-4-one (9d):**  $^1\text{H}$  NMR (300 MHz,  $\text{CDCl}_3$ ):  $\delta$  7.02 (t,  $J = 7.2$  Hz, 1 H), 6.05-5.91 (m, 1 H), 5.25-5.15 (m, 2 H), 3.56 (d,  $J = 7.2$  Hz, 2 H), 2.31 (apparent t,  $J = 7.2$  Hz, 2 H), 1.92-1.82 (m, 1 H), 0.98 (d,  $J = 6.9$  Hz, 6 H);  $^{13}\text{C}$  NMR (75 MHz,  $\text{CDCl}_3$ ):  $\delta$  192.3 (C), 140.6 (CH), 133.3 (C), 130.4 (CH), 118.9 ( $\text{CH}_2$ ), 43.4 (CH), 38.4 ( $\text{CH}_2$ ), 27.9 ( $\text{CH}_2$ ), 22.4 (2 x  $\text{CH}_3$ ); IR (neat): 3055, 1726, 1266, 739  $\text{cm}^{-1}$ ;  $R_f = 0.42$  (Hexane: EtOAc 10:1).

$^1\text{H}$  NMR (300 MHz)

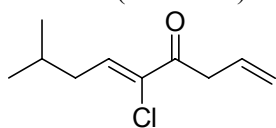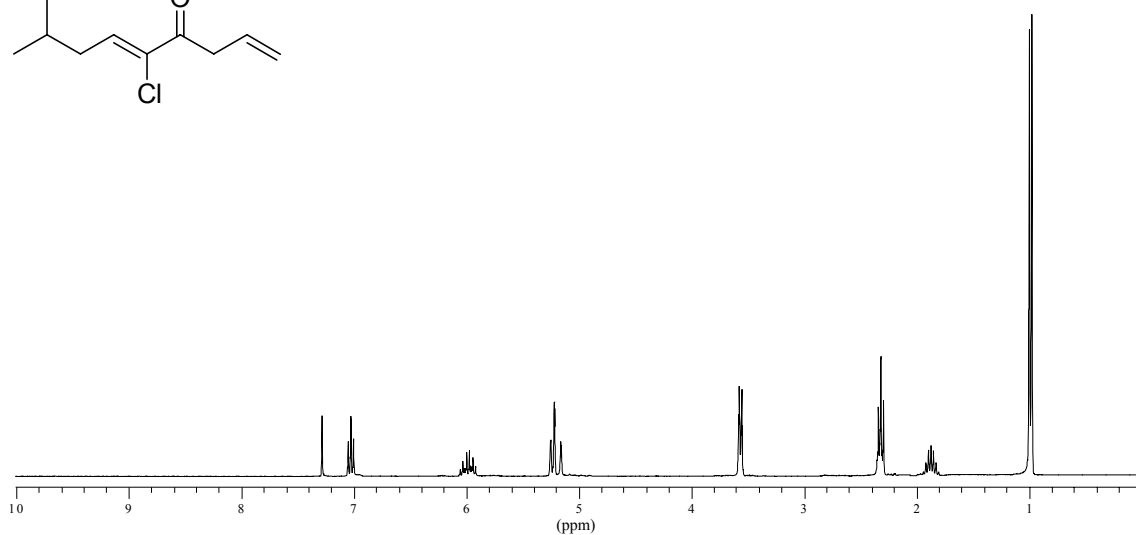

$^{13}\text{C}$  NMR (75 MHz)

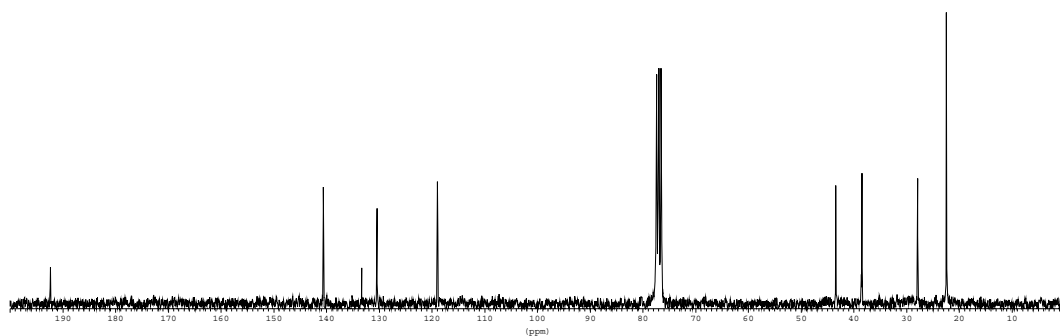

**(Z)-2-Chloro-3-cyclohexylacrylic acid (10a):**  $^1\text{H}$  NMR (300 MHz,  $\text{CDCl}_3$ ):  $\delta$  7.26 (br s, 1 H), 7.07 (d,  $J = 9.3$  Hz, 1 H), 2.66 (m, 1 H), 1.79-1.66 (m, 4 H), 1.43-1.15 (m, 6 H);  $^{13}\text{C}$  NMR (75 MHz,  $\text{CDCl}_3$ ):  $\delta$  167.6 (C), 149.8 (CH), 122.0 (C), 38.8 (CH), 30.7 (2 x  $\text{CH}_2$ ), 25.7 ( $\text{CH}_2$ ), 25.2 (2 x  $\text{CH}_2$ ); MS (70 eV, EI)  $m/z$  (%) 188 [ $M^+$ , 11], 107 (17), 82 (100), 67 (74), 41 (22); HRMS (70 eV) calc. for  $\text{C}_9\text{H}_{13}\text{ClO}_2$  188.0604, found 188.0608; IR (neat): 3430, 2925, 1692, 1624  $\text{cm}^{-1}$ ;  $R_f = 0.17$  (Hexane: EtOAc 1:1).

$^1\text{H}$  NMR (300 MHz)

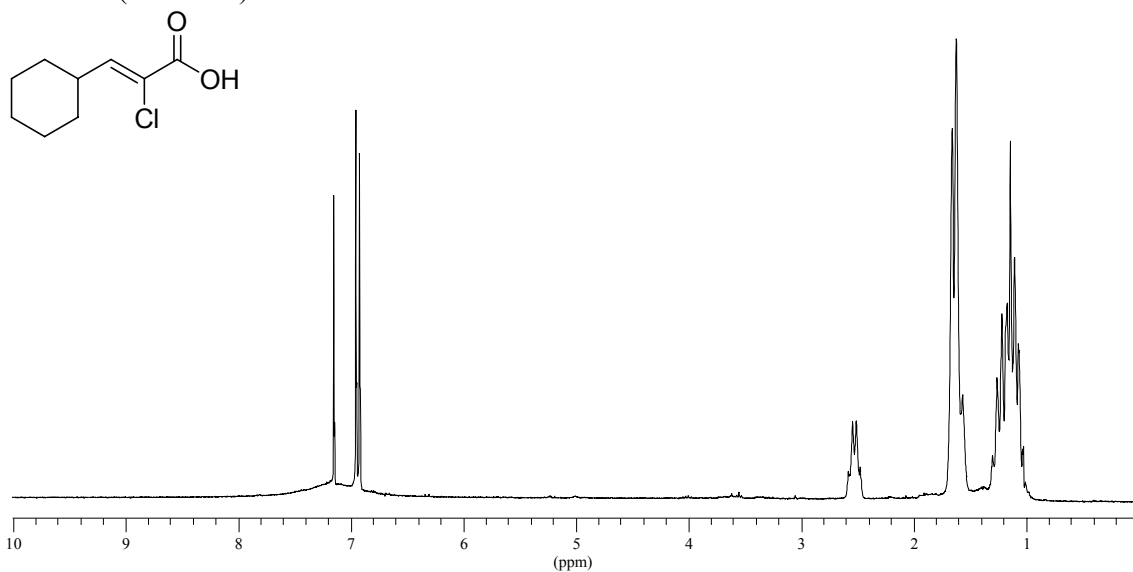

$^{13}\text{C}$  NMR (75 MHz)

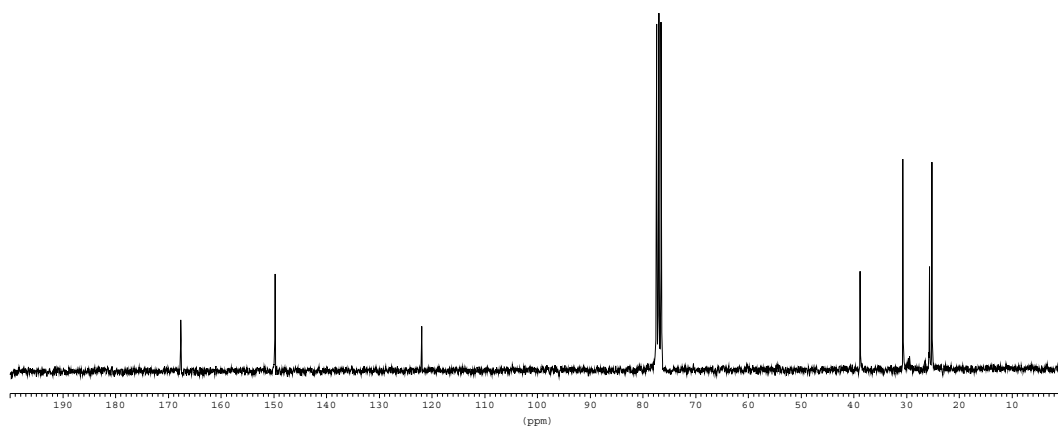

**(Z)-2-Chloro-5-methylhex-2-enoic acid (10b):**  $^1\text{H}$  NMR (300 MHz,  $\text{CDCl}_3$ ):  $\delta$  10.37 (br s, 1 H), 7.27 (t,  $J = 7.4$  Hz, 1 H), 2.31 (t,  $J = 7.2$  Hz, 2 H), 1.94-1.81 (m, 1 H), 0.98 (d,  $J = 6.6$  Hz, 3 H), 0.97 (d,  $J = 6.6$  Hz, 3 H);  $^{13}\text{C}$  NMR (75 MHz,  $\text{CDCl}_3$ ):  $\delta$  167.7 (C), 144.6 (CH), 124.3 (C), 38.5 (CH), 27.7 ( $\text{CH}_2$ ), 22.3 (2 x  $\text{CH}_3$ ); MS (70 eV, EI)  $m/z$  (%) 162 [ $M^+$ , 8], 120 (100), 69 (15), 56 (25); HRMS (70 eV) calc. for  $\text{C}_7\text{H}_{11}\text{ClO}_2$  162.0448, found 162.0450; IR (neat): 3426, 1630, 1466, 1266  $\text{cm}^{-1}$ ;  $R_f = 0.17$  (Hexane: EtOAc 3:1).

$^1\text{H}$  NMR (300 MHz)

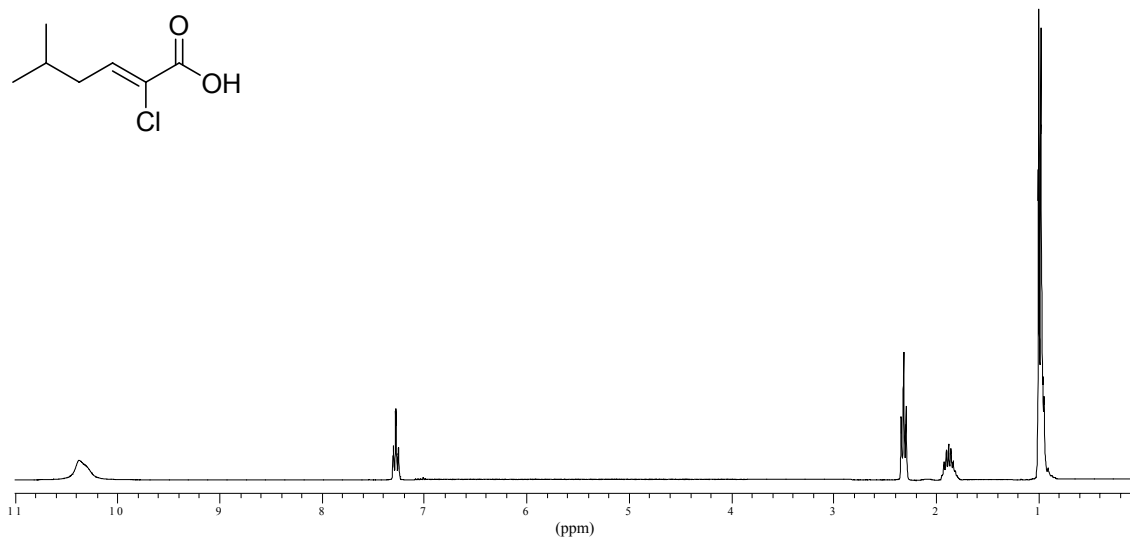

$^{13}\text{C}$  NMR (75 MHz)

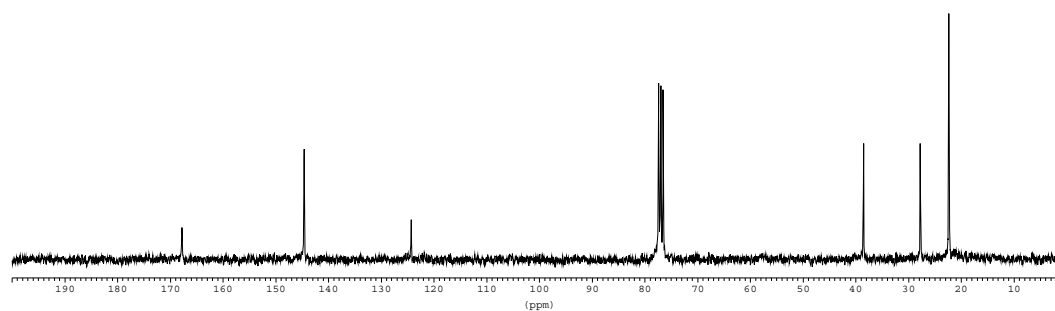

**(Z)-2-Chloro-3-cyclohexylprop-2-en-1-ol (11b):**  $^1\text{H}$  NMR (300 MHz,  $\text{CDCl}_3$ ):  $\delta$  5.64 (d,  $J = 9.0$  Hz, 1 H), 4.17 (s, 2 H), 2.54-2.44 (m, 1 H), 2.08 (br s, 1 H), 1.82-1.52 (m, 6 H), 1.35-1.16 (m, 4 H);  $^{13}\text{C}$  NMR (75 MHz,  $\text{CDCl}_3$ ):  $\delta$  132.5 (CH), 131.1 (C), 67.4 ( $\text{CH}_2$ ), 34.3 (CH), 33.6 (2 x  $\text{CH}_2$ ), 32.1 (2 x  $\text{CH}_2$ ), 31.8 ( $\text{CH}_2$ ); MS (70 eV, EI)  $m/z$  (%) 174 [ $M^+$ , 4], 159 (59), 123 (100), 81 (85), 55 (55); HRMS (70 eV) calc. for  $\text{C}_9\text{H}_{15}\text{ClO}$  174.0811, found 174.0817; IR (neat): 3357, 2924, 1449  $\text{cm}^{-1}$ ;  $R_f = 0.46$  (Hexane: EtOAc 5:1).

$^1\text{H}$  NMR (300 MHz)

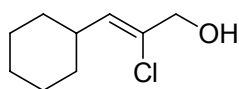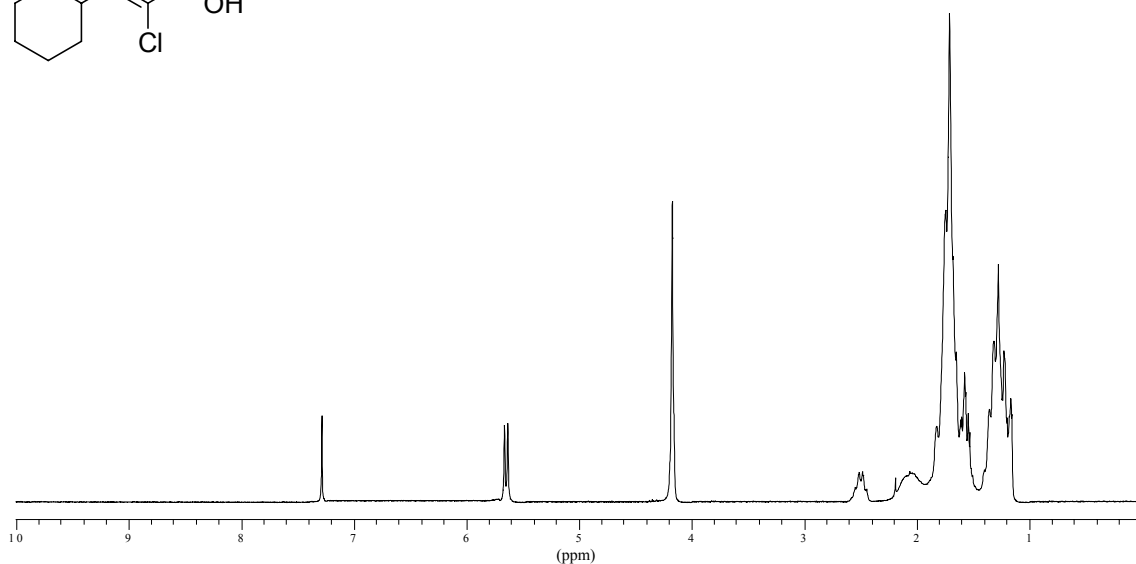

$^{13}\text{C}$  NMR (75 MHz)

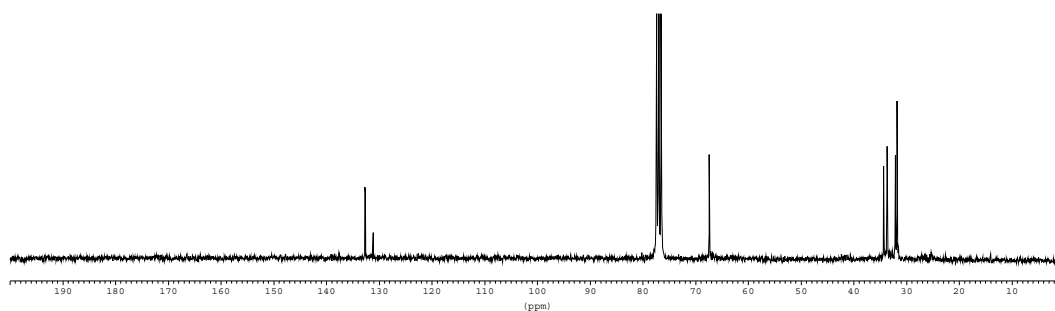

Supplement: b803449d.pdf [file b803449d.pdf]
